# Supplementary material for: Influence of Biomacromolecules on Calcium Phosphate Formation on TiO2 Nanomaterials
Source: MDPI journal article supplement (doi:10.3390/min12121557), 2022-12-02
Supplement: s1 [file s1]

Archive with 1 entries (1 files):
- minerals-1990699-supplementary.pdf
