# Supplementary material for: Influence of Biomacromolecules on Calcium Phosphate Formation on TiO2 Nanomaterials
Source: MDPI journal article supplement (doi:10.3390/min12121557), 2022-12-02
Supplement: s1 [file s1 › minerals-1990699-supplementary.pdf]

# Influence of Biomacromolecules on Calcium Phosphate Formation on TiO<sub>2</sub> Nanomaterials

## Content of listed material

**Figure S1.** FTIR spectra and corresponding first- and second-order derivatives of bovine serum albumin (BSA), chitosan (Chi), calcium-deficient hydroxyapatite (CaDHA), and CaDHA formed in the presence of BSA or Chi.

**Figure S2.** FTIR spectra and corresponding first- and second-order derivatives of calcium-deficient hydroxyapatite (CaDHA) formed in the control system and in the presence of bovine serum albumin or chitosan and TiO<sub>2</sub> nanoparticles.

**Figure S3.** FTIR spectra and corresponding first- and second-order derivatives of calcium-deficient hydroxyapatite (CaDHA) formed in the control system and in the presence of bovine serum albumin or chitosan and TiO<sub>2</sub> nanoplates.

**Figure S4.** FTIR spectra and corresponding first- and second-order derivatives of calcium-deficient hydroxyapatite (CaDHA) formed in the control system and in the presence of bovine serum albumin or chitosan and titanate nanotubes.

**Figure S5.** FTIR spectra and corresponding first- and second-order derivatives of calcium-deficient hydroxyapatite (CaDHA) formed in the control system and in the presence of bovine serum albumin or chitosan and TiO<sub>2</sub>(B) / titanate nanowires.

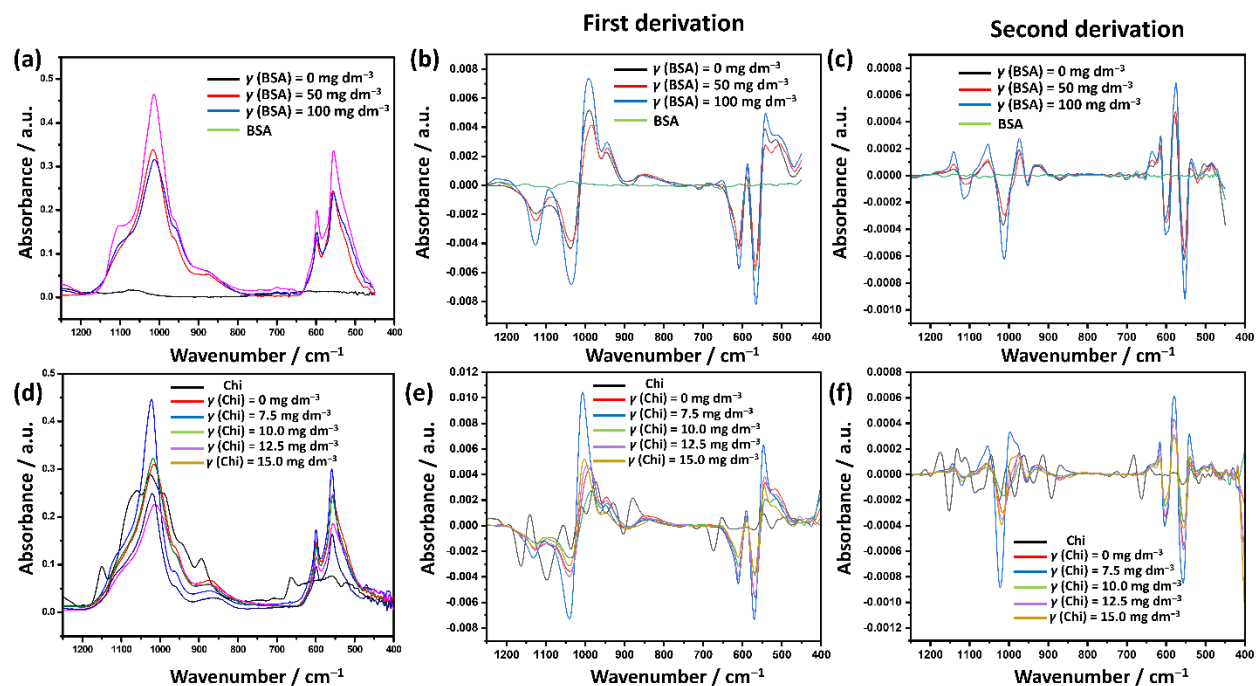

**Figure S1.** (a,d) FTIR spectra and corresponding (b,e) first-order and (c,f) second-order derivatives of the same FTIR spectra of bovine serum albumin (BSA), chitosan (Chi), calcium-deficient hydroxyapatite (CaDHA), and CaDHA formed in the presence of different concentrations of (a–c) BSA and (d–f) Chi.

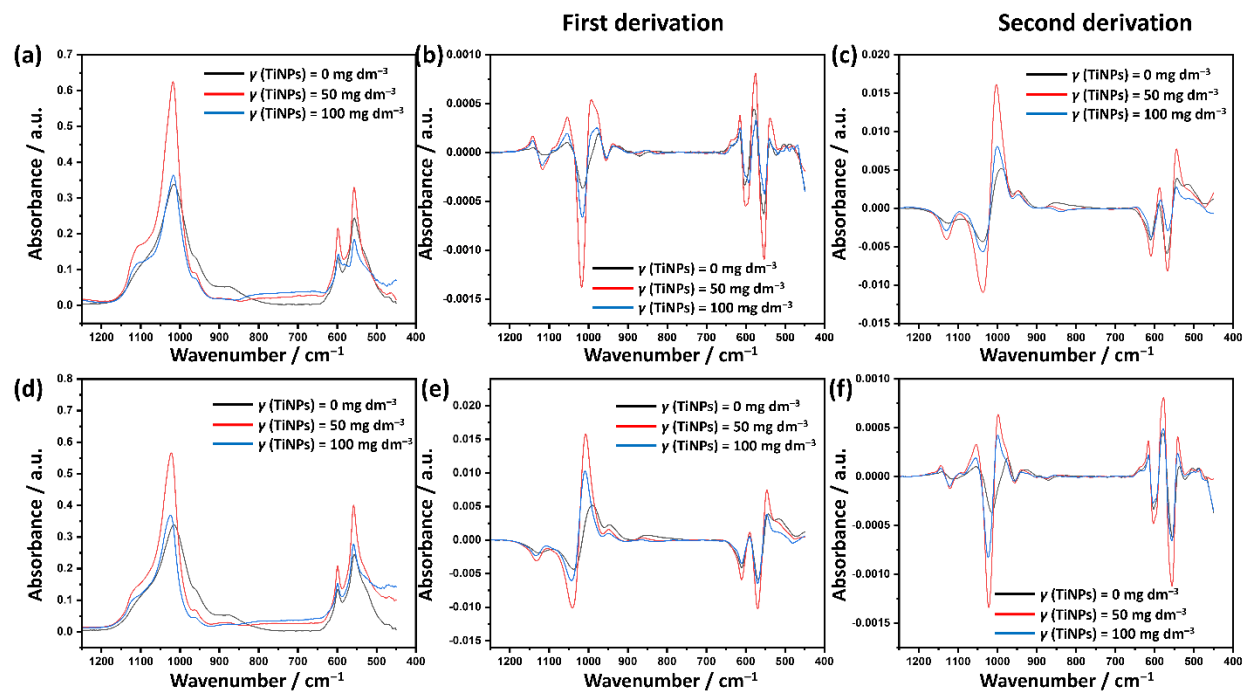

**Figure S2.** (a,d) FTIR spectra and corresponding (b,e) first-order and (c,f) second-order derivatives of the same FTIR spectra of bovine serum albumin (BSA), chitosan (Chi), calcium-deficient hydroxyapatite (CaDHA), and CaDHA formed in the presence of different concentrations of  $\text{TiO}_2$  nanoparticles (TiNPs) and (a–c) BSA and (d–f) Chi.

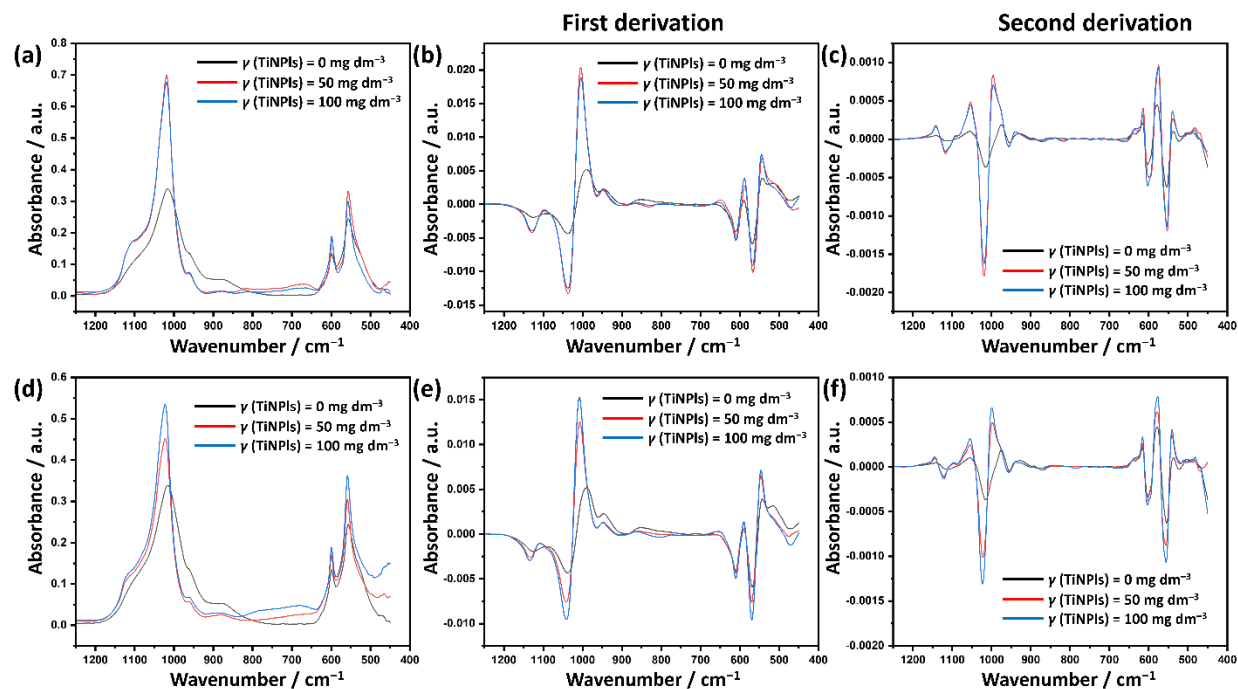

**Figure S3.** (a,d) FTIR spectra and corresponding (b,e) first-order and (c,f) second-order derivatives of the same FTIR spectra of bovine serum albumin (BSA), chitosan (Chi), calcium-deficient hydroxyapatite (CaDHA), and CaDHA formed in the presence of different concentrations of TiO<sub>2</sub> nanoplates (TiNPIs) and (a–c) BSA and (d–f) Chi.

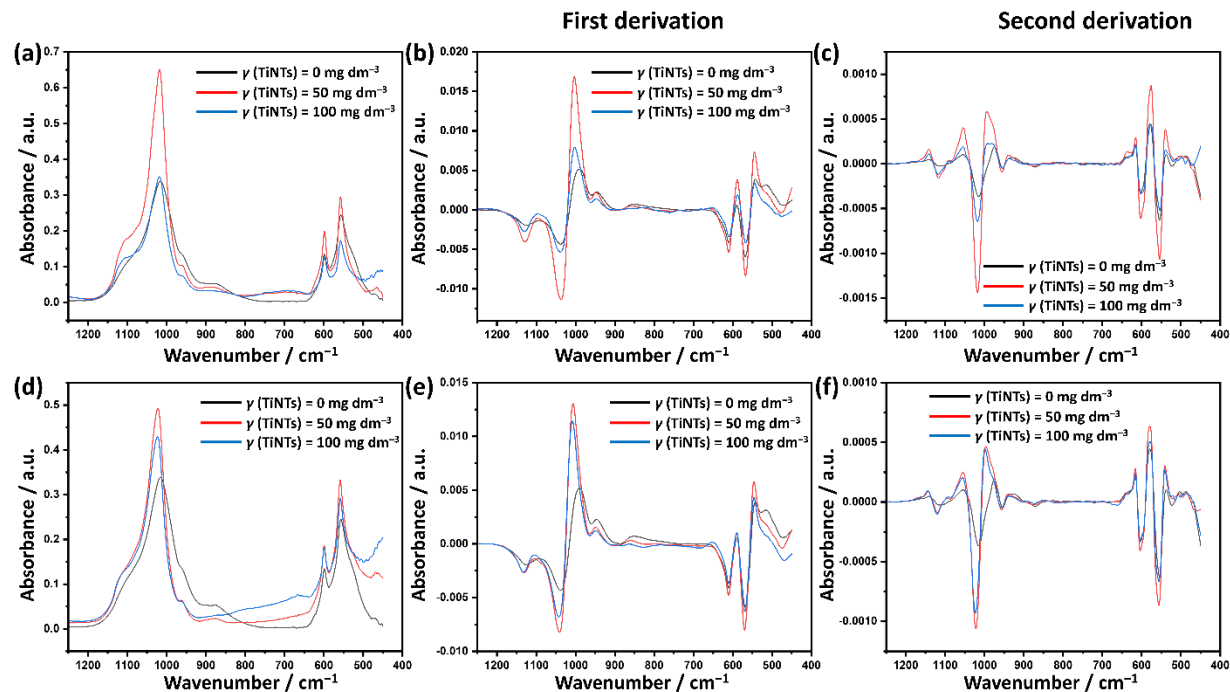

**Figure S4** (a,d) FTIR spectra and corresponding (b,e) first-order and (c,f) second-order derivatives of the same FTIR spectra of bovine serum albumin (BSA), chitosan (Chi), calcium-deficient hydroxyapatite (CaDHA), and CaDHA formed in the presence of different concentrations of titanate nanotubes (TiNTs) and (a–c) BSA and (d–f) Chi.

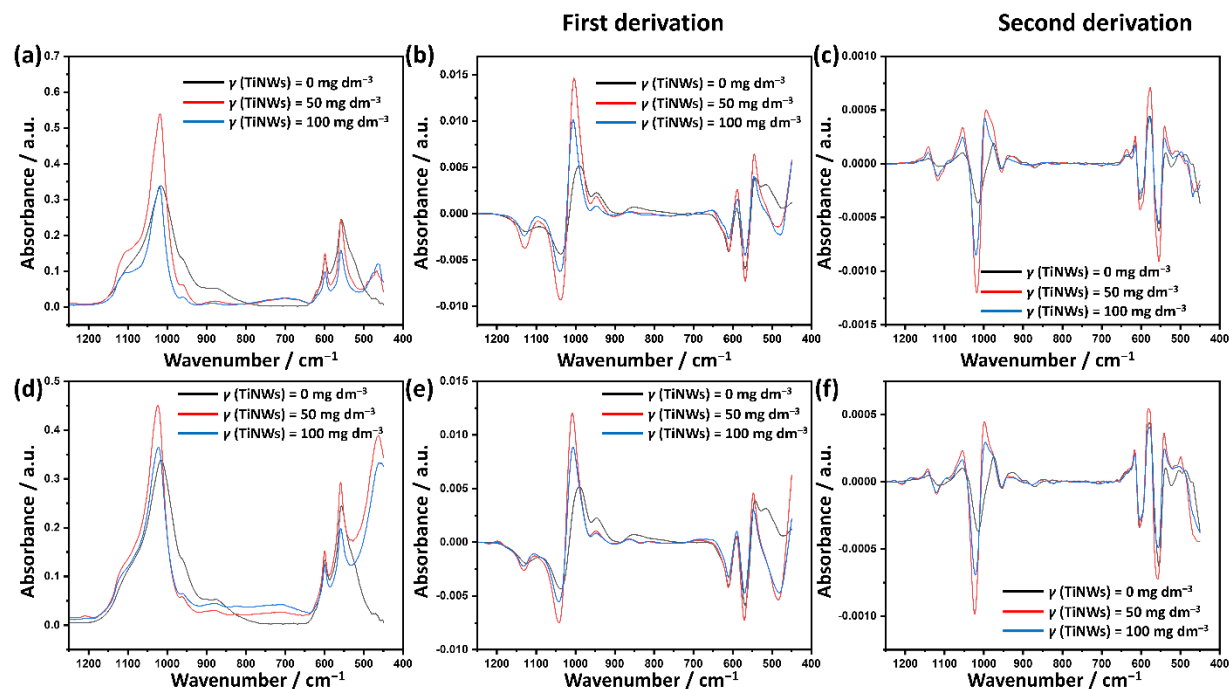

**Figure S5.** (a,d) FTIR spectra and corresponding (b,e) first-order and (c,f) second-order derivatives of the same FTIR spectra of bovine serum albumin (BSA), chitosan (Chi), calcium-deficient hydroxyapatite (CaDHA), and CaDHA formed in the presence of different concentrations of  $\text{TiO}_2(\text{B})$  / titanate nanowires (TiNWs) and (a–c) BSA and (d–f) Chi.
